# Supplementary material for: EULAR recommendations for the role of the nurse in the management of chronic inflammatory arthritis
Source: HighWire-hosted journal article supplement (doi:10.1136/annrheumdis-2011-200185), 2011-10-29
Supplement: annrheumdis-2011-200185_ds1.pdf [file annrheumdis-2011-200185_ds1.pdf]

## Appendix 1. Search terms systematic literature review

### **OID SP Search (Medline, Embase and Cochrane Central)**

1. exp arthritis, rheumatoid/
2. ((rheumatoid or reumatoid or revmatoid or rheumatic or reumatic or revmatic or rheumat\$ or reumat\$ or revmarthrit\$) adj3 (arthrit\$ or artrit\$ or diseas\$ or condition\$ or nodule\$)).tw.
3. (felty\$ adj2 syndrome).tw.
4. (caplan\$ adj2 syndrome).tw.
5. (sjogren\$ adj2 syndrome).tw.
6. (sicca adj2 syndrome).tw.
7. still\$ disease.tw.
8. bechterew\$ disease.tw.
9. exp Spondylarthropathies/
10. (ankylos\$ or spondyl\$).tw.
11. (bekhterev\$ or bechterew\$).tw.
12. (Marie adj struempell\$).tw.
13. exp Arthritis, Psoriatic/
14. (psoria\$ adj (arthriti\$ or arthropath\$)).tw.
15. ((arthriti\$ or arthropath\$) adj psoria\$).tw.
16. undifferentiated oligoarthritis.tw.
17. or/1-16
18. exp Inflammatory Bowel Diseases/
19. exp Arthritis/
20. 18 and 19
21. ((inflamm\$ or ibd or chrohn\$ or enteropath\$) adj5 (arthrit\$ or arthrop\$)).tw.
22. (granulomatous colitis adj5 (arthrit\$ or arthrop\$)).tw.
23. (ulcerative colitis adj5 (arthrit\$ or arthrop\$)).tw.

24. (granulomatous enteritis adj5 (arthrit\$ or arthrop\$)).tw.
25. (regional enteritis adj5 (arthrit\$ or arthrop\$)).tw.
26. (Ileocolitis adj5 (arthrit\$ or arthrop\$)).tw.
27. (terminal ileitis adj5 (arthrit\$ or arthrop\$)).tw.
28. (regional ileitis adj5 (arthrit\$ or arthrop\$)).tw.
29. or/17,20-28
30. exp Nurse/
31. (Nurs\$ adj (care or role\$ or skill\$ or competenc\$ or care or assessment\$ or diagnosis or intervention\$)).tw.
32. exp nursing/
33. ( registered adj nurs\$).tw.
34. (qualified adj nurs\$).tw.
35. (student adj nurs\$).tw.
36. (practice\$ adj nurs\$).tw.
37. (nurs\$ adj administrator).tw.
38. exp nurse practitioner/
39. (expert adj nurs\$).tw
40. (advanced adj nur\$ adj pract\$).tw.
41. (nurs\$ adj (led or manag\$ or clinic\$ or directed)).tw.
42. exp nurse clinicians/
43. advanced practice nurse.mp.
44. nurse.mp.
45. nurse practi\*.mp.
46. Clinical nurse specialist\$.mp.
47. rheumatology nurs\*.mp.
48. physician assistant\$.mp.
49. (nurs\$ adj (consultant\$ or specialist\$ or counsel\$)).tw.
50. or/30-49

51. 29 AND 50

**EBSCO host search (CINAHL, PsycINFO)**

CINAHL

1. (MH "arthritis, rheumatoid+")
2. TX ((rheumatoid or reumatoid or revmatoid or rheumatic or reumatic or revmatic or rheumat\* or reumat\* or revmarthrit\*) and (arthrit\* or artrit\* or diseas\* or condition\* or nodule\*))
3. TX (felty\* syndrome)
4. TX (caplan\* syndrome)
5. TX (sjogren\* syndrome)
6. TX (sicca syndrome).tw.
7. TX (still\* disease)
8. TX (bechterew\* disease)
9. (MH "Spondylarthropathies+")
10. TX (ankylos\* or spondyl\*)
11. TX (bekhterev\* or bechterew\*)
12. TX (Marie struempell\*)
13. (MH "Arthritis, Psoriatic")
14. TX (psoria\* and (arthriti\* or arthropath\*))
15. TX ((arthriti\* or arthropath\*) and psoria\*)
16. TX (undifferentiated oligoarthritis)
17. (MH "Inflammatory Bowel Diseases+")
18. (MH "Arthritis+")
19. 17 and 18
20. TX ((inflamm\* or ibd or chrohn\* or enteropath\*) and (arthrit\* or arthrop\*))

21. TX (granulomatous colitis and (arthrit\* or arthrop\*))
22. TX (ulcerative colitis and (arthrit\* or arthrop\*))
23. TX (granulomatous enteritis and (arthrit\* or arthrop\*))
24. TX (regional enteritis and (arthrit\* or arthrop\*))
25. TX (Ileocolitis and (arthrit\* or arthrop\*))
26. TX (terminal ileitis and (arthrit\* or arthrop\*))
27. TX (regional ileitis and (arthrit\* or arthrop\*))
28. (MH Nurses+)
20. TX (Nurs\* and (care or role\* or skill\* or competenc\* or care or assessment\* or diagnosis or intervention\*))
30. nursing
31. TX (registered nurs\*)
32. TX (qualified nurs\*)
33. TX (student nurs\*)
34. TX (practice\* nurs\*)
35. TX (nurs\* administrator)
36. (MH "nurse practitioners+")
37. TX (expert nurs\*)
38. TX (advanced nurs\* pract\*)
30. TX (nurs\* and (led or manag\* or clinic\* or directed))
40. nurse clinicians
41. advanced practice nurse
42. (MH "Advanced Practice Nurses+")
43. nurse
44. nurse practi\*
45. Clinical nurse specialist
46. rheumatology nurs\*
47. physician assistant\*

48. nurs\* and (consultant\* or specialist\* or counsel\*)
49. or/28-48
50. or/1-16
- 51.50 or/19-27
52. 49 AND 51

### PsycINFO

1. DE "Rheumatoid Arthritis"
2. TX ((rheumatoid or reumatoid or revmatoid or rheumatic or reumatic or revmatic or rheumat\* or reumat\* or revmarthrit\*) and (arthrit\* or artrit\* or diseas\* or condition\* or nodule\*))
3. TX (felty\* syndrome)
4. TX (caplan\* syndrome)
5. TX (sjogren\* syndrome)
6. TX (sicca syndrome)
7. TX (still\* disease)
8. TX (bechterew\* disease)
9. TX (ankylos\* or spondyl\*)
10. TX (bekhterev\* or bechterew\*)
11. TX (Marie struempell\*)
12. TX (psoria\* and (arthriti\* or arthropath\*))
13. TX ((arthriti\* or arthropath\*) and psoria\*)
14. TX (undifferentiated oligoarthritis)
15. psoriatic arthritis
16. spondylarthropathies
17. Inflammatory Bowel Diseases
18. DE "Arthritis"

19. 17 and 18
20. or/ 1-16
21. TX ((inflamm\* or ibd or chrohn\* or enteropath\*) and (arthrit\* or arthrop\*))
22. TX (granulomatous colitis and (arthrit\* or arthrop\*))
23. TX (ulcerative colitis and (arthrit\* or arthrop\*))
24. TX (granulomatous enteritis and (arthrit\* or arthrop\*))
25. TX (regional enteritis and (arthrit\* or arthrop\*))
26. TX (Ileocolitis and (arthrit\* or arthrop\*))
27. TX (terminal ileitis and (arthrit\* or arthrop\*))
28. TX (regional ileitis and (arthrit\* or arthrop\*))
29. DE "Nurses" OR DE "Psychiatric Nurses" OR DE "Public Health Service Nurses" OR DE "School Nurses"
30. TX (Nurs\* and (care or role\* or skill\* or competenc\* or care or assessment\* or diagnosis or intervention\*))
31. DE "Nursing"
32. TX (registered nurs\*)
33. TX (qualified nurs\*)
34. TX (student nurs\*)
35. TX (practice\* nurs\*)
36. TX (nurs\* administrator)
37. nurse practitioner\*
38. TX (expert nurs\*)
39. TX (advanced nurs\* pract\*)
40. TX (nurs\* and (led or manag\* or clinic\* or directed))
41. nurse clinicians
42. advanced practice nurse\*
43. nurse
44. nurse practi\*

45. Clinical nurse specialist

46. rheumatology nurs\*

47. physician assistant\*

48. nurs\* and (consultant\* or specialist\* or counsel\*)

49. or/29-48

50. 1 or 3 or 5 or 6 or 8 or 9 or 10 or 12 or 13 or 14 or16

51. 21 or 23 or 25 or 26

52. 50 or 51

52. 49 AND 52
